# Supplementary material for: Rapid analysis of aerosol drugs using nano extractive electrospray ionization tandem mass spectrometry
Source: Royal Society of Chemistry journal article supplement (doi:10.1039/b923991j), 2010-01-01
Supplement: b923991j.pdf [file b923991j.pdf]

# **Rapid Analysis of Aerosol Drugs Using Nano Extractive Electrospray Ionization Tandem Mass Spectrometry**

**Haiwei Gu, Bin Hu, Jianqiang Li, Shuiping Yang, Jing Han, Huanwen Chen\***

College of Chemistry, Biology and Material Science, East China Institute of  
Technology, Fuzhou, Jiangxi Province 344000, P. R. China

\* Corresponding author:

Prof. Dr. Huanwen Chen

Department of Applied Chemistry

East China Institute of Technology

Fuzhou, Jiangxi Province 344000

P. R. China

Fax: (86)-794-8258-320

E-mail: [chw8868@gmail.com](mailto:chw8868@gmail.com)

## Supplementary Figures

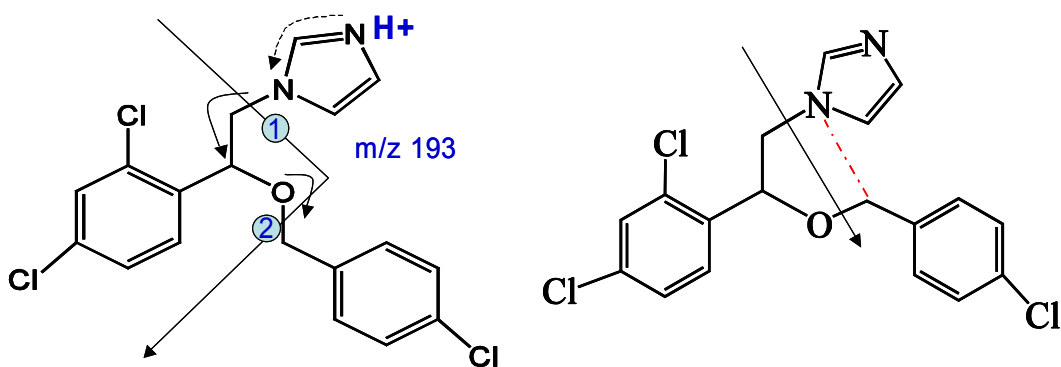

Figure S1

Figure S1 Diagram of the proposed dissociation mechanism generating peaks at  $m/z$  193 and 195 from the precursor ions at  $m/z$  383.

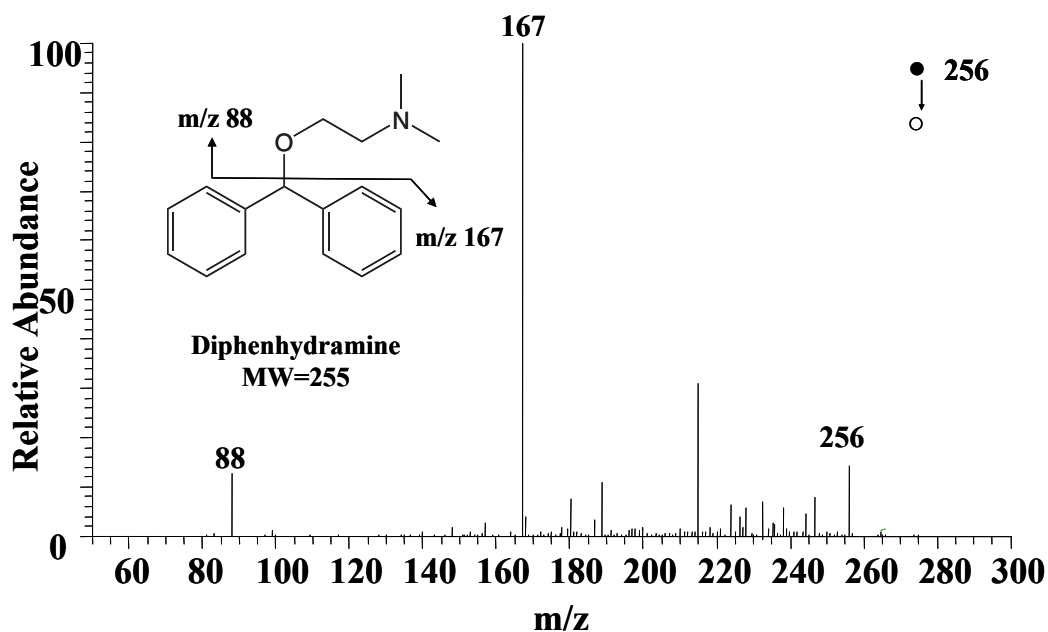

Figure S2

Figure S2 MS/MS spectrum of diphenhydramine (at  $m/z$  256) from a compound methyl salicylate and diphenhydramine spray sample.

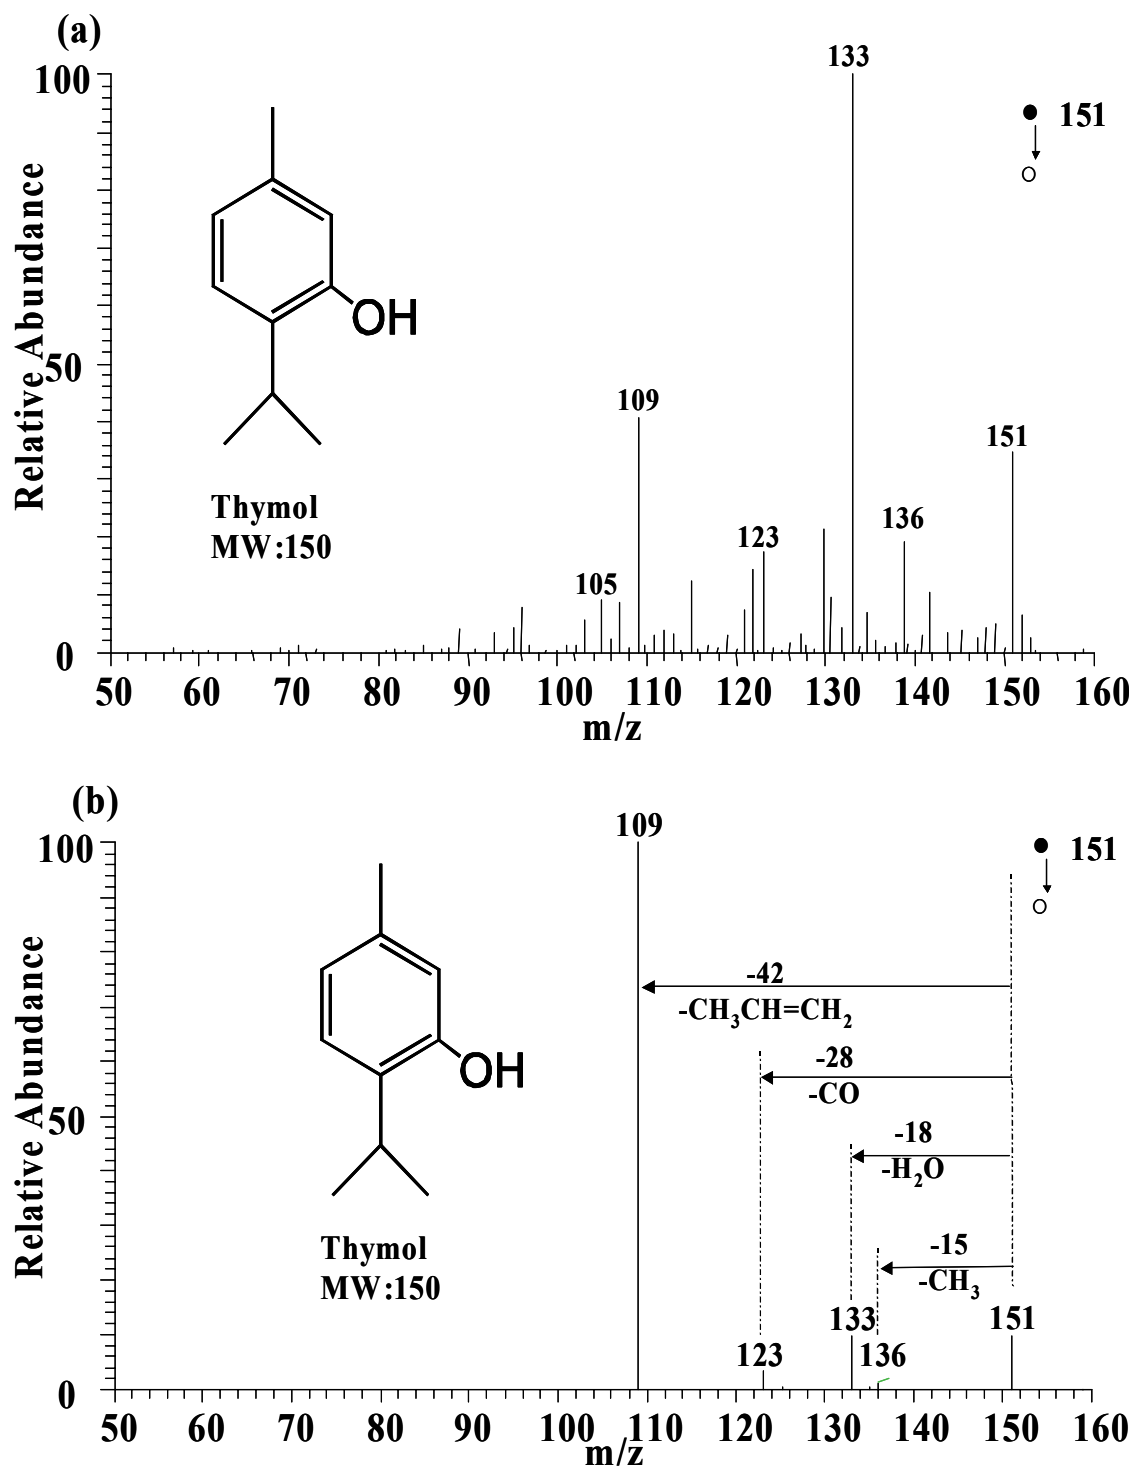

Figure S3

Figure S3 MS/MS spectra of thymol (at m/z 151) from a) a compound methyl salicylate and diphenhydramine spray sample, b) a standard solution of authentic thymol in methanol/water (1:1, v/v).

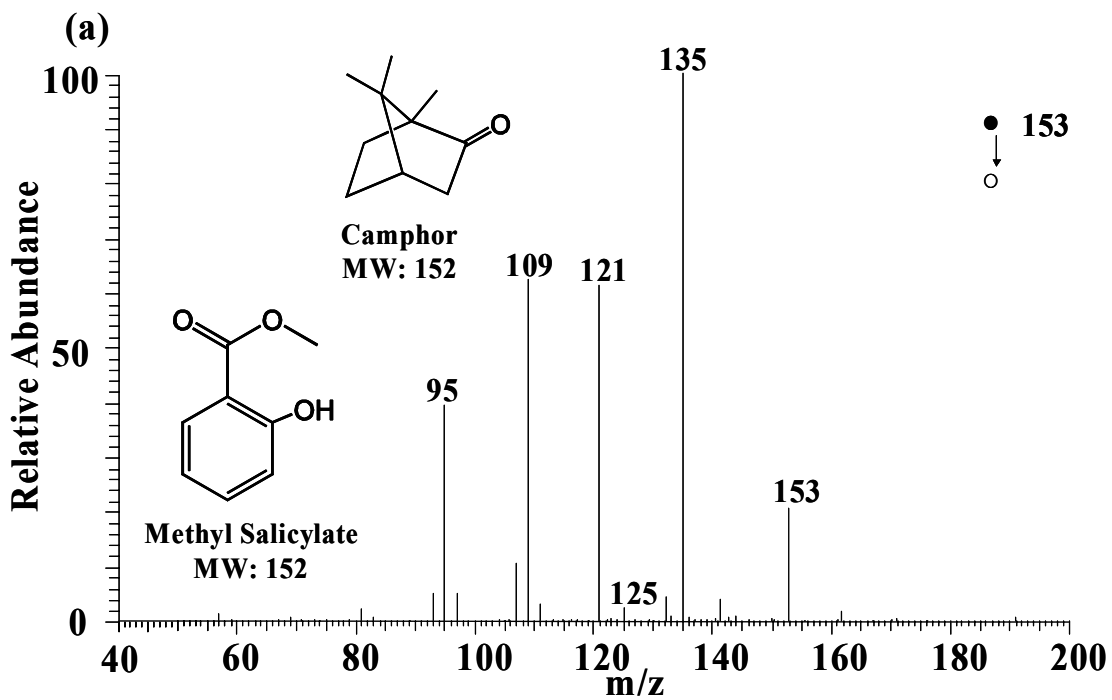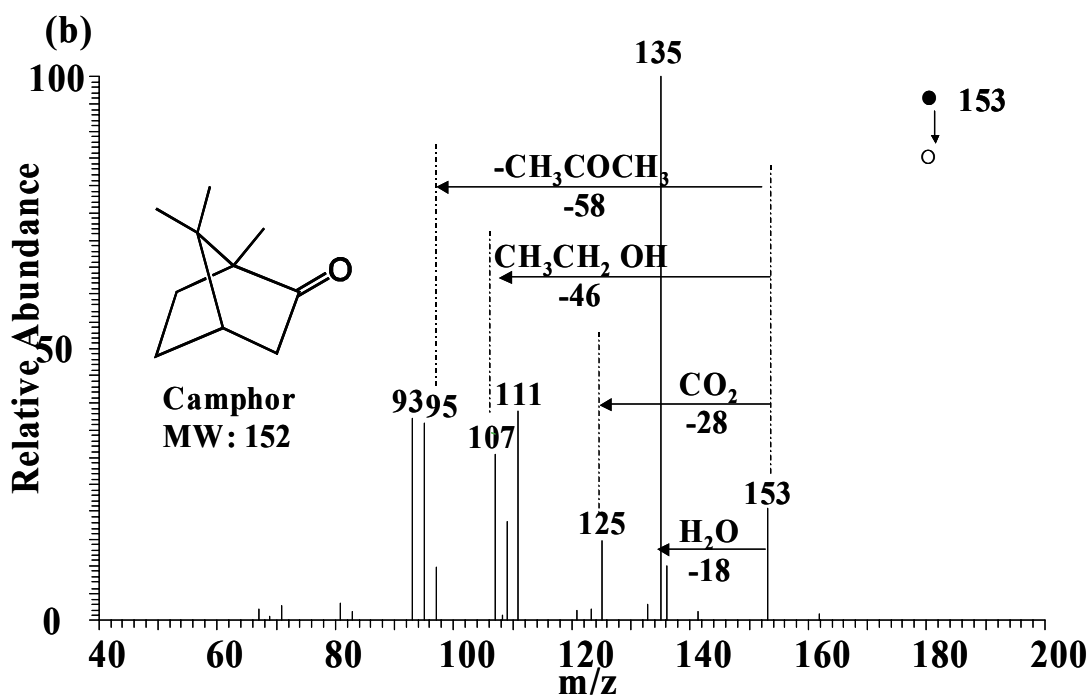

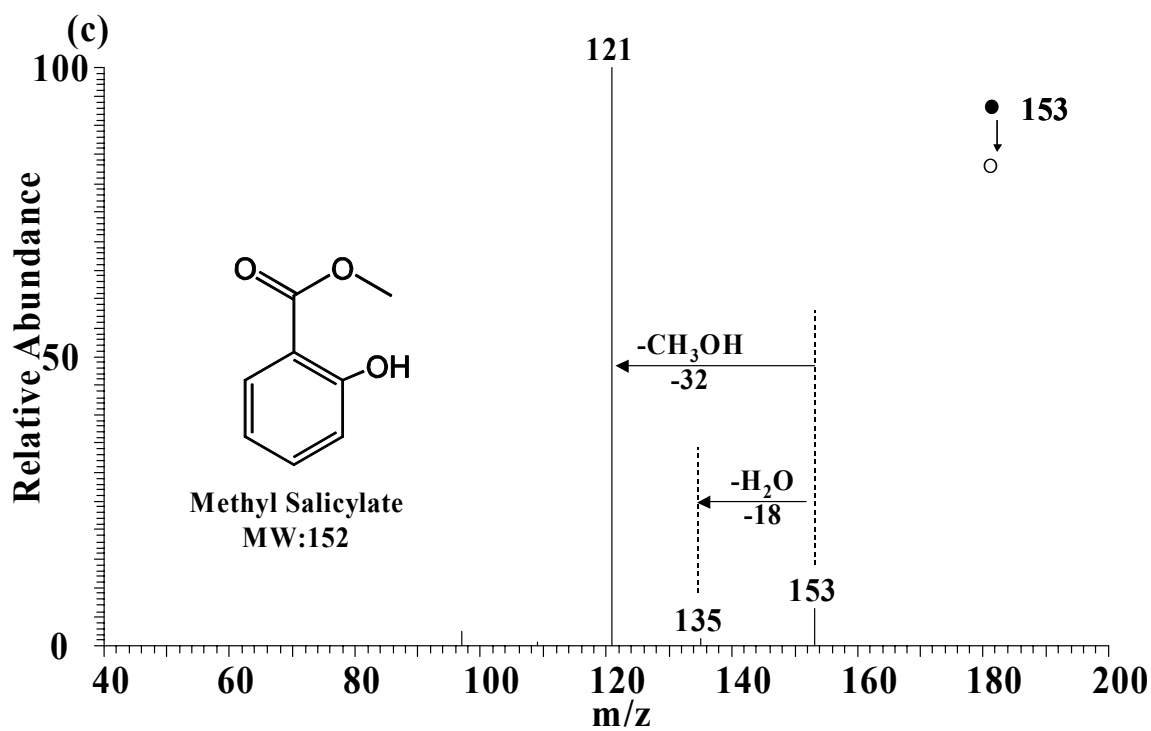

Figure S4

Figure S4 MS/MS spectra of the peak at m/z 153 from a) a compound methyl salicylate and diphenhydramine spray sample, b) a standard solution of authentic camphor in methanol/water (1:1, v/v), c) a standard solution of authentic methyl salicylate in methanol/water (1:1, v/v).

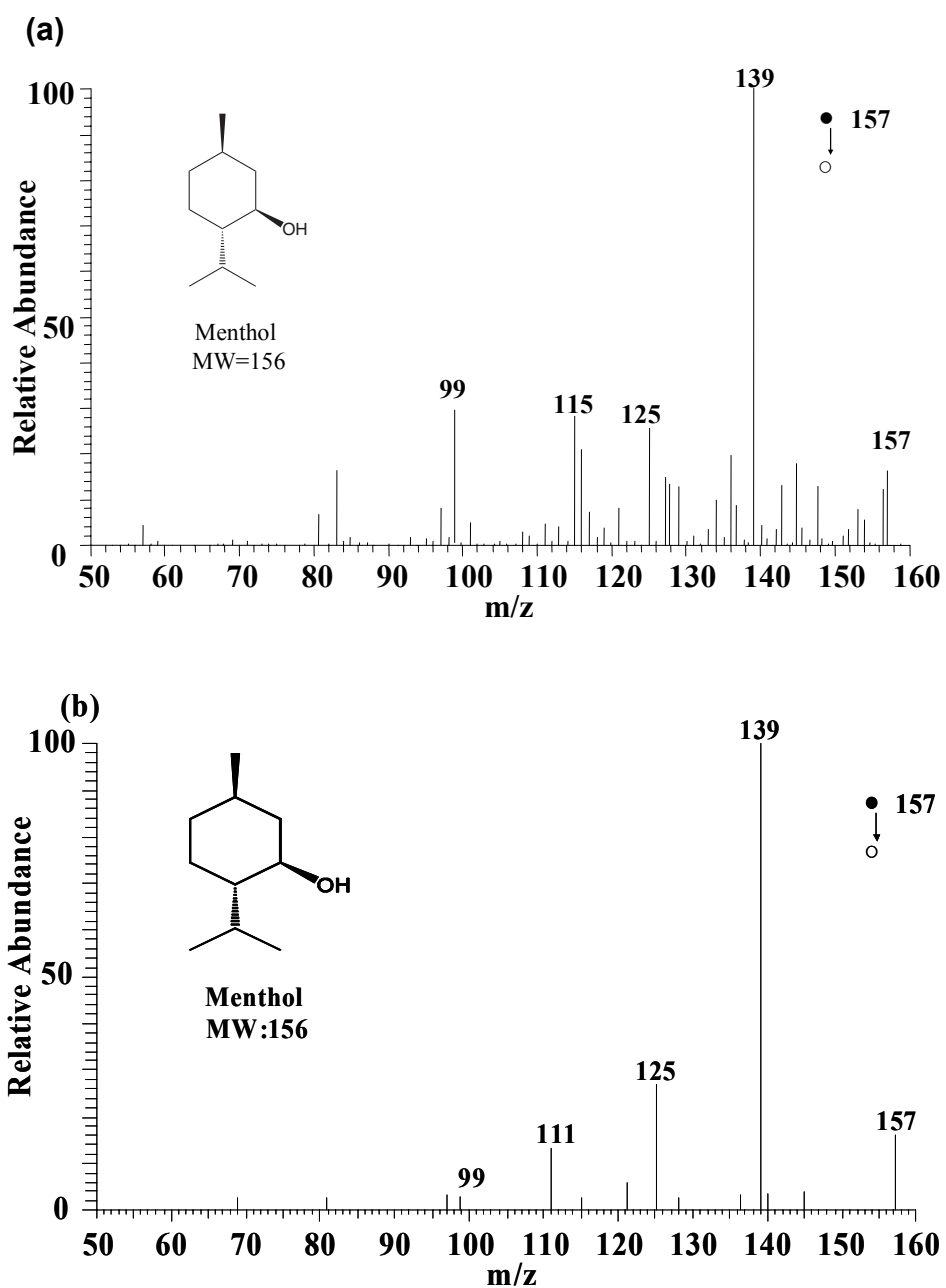

Figure S5

Figure S5 MS/MS spectra of menthol (at  $m/z$  157) from a) a compound methyl salicylate and diphenhydramine spray sample, b) a standard solution of authentic menthol in methanol/water (1:1, v/v).
